# Supplementary material
Source: publisher site journal article supplement (https://www.dovepress.com/article/350959)
Supplement: Supplementary file 1 [file get_supplementary_file.php]

**Supplementary Table 1 : Pyroptosis-related genes and Pyroptosis-related DEGs in PAAD**

| <b>Pyroptosis related Genes</b> | <b>Pyroptosis related DEGs in PAAD</b> |
|---------------------------------|----------------------------------------|
| AIM2                            | TNF                                    |
| CASP5                           | CASP1                                  |
| CASP9                           | CASP3                                  |
| ELANE                           | CASP4                                  |
| GSDMA                           | CASP6                                  |
| GSDMC                           | CASP8                                  |
| NLRC4                           | GPX4                                   |
| NLRP2                           | GSDMB                                  |
| NLRP6                           | GSDMD                                  |
| NLRP7                           | DFNA5                                  |
| PJK                             | IL18                                   |
| TIRAP                           | IL1B                                   |
| TNF                             | IL6                                    |
| CASP1                           | NLRP1                                  |
| CASP3                           | NLRP3                                  |
| CASP4                           | NOD1                                   |
| CASP6                           | NOD2                                   |
| CASP8                           | PLCG1                                  |
| GPX4                            | PYCARD                                 |
| GSDMB                           | Stat3                                  |
| GSDMD                           | RIPK3                                  |
| DFNA5                           | HMGB1                                  |
| IL18                            | ZBP1                                   |
| IL1B                            | NEK7                                   |
| IL6                             | SYK                                    |
| NLRP1                           | AKT1                                   |
| NLRP3                           | FOXO1                                  |
| NOD1                            | PSMB8                                  |
| NOD2                            | PTEN                                   |
| PLCG1                           | SPHK1                                  |
| PYCARD                          | TLR4                                   |
| Stat3                           | SDHB                                   |
| PDL1                            | TREM1                                  |
| PCSK9                           | APAF1                                  |
| HDAC6                           | CRTAC1                                 |
| RIPK3                           | TLR2                                   |
| HMGB1                           | GDF11                                  |
| ZBP1                            | HOXA3                                  |
| NEK7                            | NLRX1                                  |
| Nrf2                            | PINK1                                  |

---

|         |           |
|---------|-----------|
| SYK     | MAPK3     |
| CD73    | MAPK1     |
| AKT1    | TRIM31    |
| FOXO1   | TFAM      |
| HSPA12A | MEG3      |
| NLRP12  | CYP1B1    |
| PSMB8   | PKM       |
| PTEN    | IL1R1     |
| SPHK1   | SNIP1     |
| TLR4    | RCN2      |
| SDHB    | ROCK1     |
| TREM1   | TFE3      |
| APAF1   | NRF1      |
| CRTAC1  | UQCRC1    |
| TLR2    | TXNIP     |
| SENP7   | WNK1      |
| GDF11   | PTGS2     |
| HOXA3   | TREM1     |
| NLRX1   | ITPR1     |
| PINK1   | TFEB      |
| MAPK3   | NLRC5     |
| MAPK1   | SLC5A1    |
| TRIM31  | PRDM1     |
| TFAM    | GABARAPL2 |
| IGF1    | GABARAP   |
| MEG3    | TREM2     |
| CYP1B1  | CLEC5A    |
| SIRT1   | CD38      |
| PKM     | RIPK3     |
| IL1R1   | TP53      |
| CNR2    | KLF2      |
| SNIP1   | HK1       |
| HERC2   | NOX4      |
| RCN2    | ZBP1      |
| SP1     | IRF1      |
| ROCK1   | MAP3K11   |
| CXCL12  | METTL14   |
| PRKAA1  | MAP4      |
| TFE3    | APEX1     |
| HDAC11  | APAF1     |
| HOTAIR  | MELK      |
| NRF1    |           |
| PCSK9   |           |
| UQCRC1  |           |

---

---

TXNIP  
WNK1  
APBA3  
PTGS2  
AKT2  
TREM1  
ITPR1  
SIRT3  
MTOR  
TFEB  
NLRC5  
BRD4  
DRD2  
SLC5A1  
PRDM1  
GABARAPL2  
GABARAP  
CARD8  
TREM2  
CLEC5A  
ADAR3  
CD38  
RIPK3  
DR6  
TP53  
SIRT1  
BDNF  
KLF2  
HK1  
CHRFAM7A  
TRIM24  
PHLPP2  
NOX4  
ZBP1  
IRF1  
MAP3K11  
METTL14  
RACK1  
MAP4  
FOXO3  
CDK9  
P2RX7  
APEX1  
APAF1

---

---

NAIP  
MELK  
HDAC6

---

**Supplementary Table 2:** Prognostic Pyroptosis-related DEGs

| Gene names | Overall survival | Disease free survival | Pathological stage |
|------------|------------------|-----------------------|--------------------|
| CASP3      | √                |                       |                    |
| CASP4      | √                | √                     |                    |
| GSDMB      | √                |                       |                    |
| IL18       | √                | √                     | √                  |
| NLRP1      | √                | √                     |                    |
| PLCG1      | √                |                       |                    |
| HMGB1      | √                | √                     |                    |
| NEK7       | √                |                       |                    |
| APAF1      | √                |                       |                    |
| GDF11      | √                |                       | √                  |
| PKM        | √                | √                     |                    |
| ITPR1      | √                |                       |                    |
| TFEB       | √                |                       |                    |
| GABARAP    | √                | √                     | √                  |
| MELK       | √                | √                     |                    |

√ :means genes have relationship with Overall survival or disease free time or stage

### Supplementary Figure1

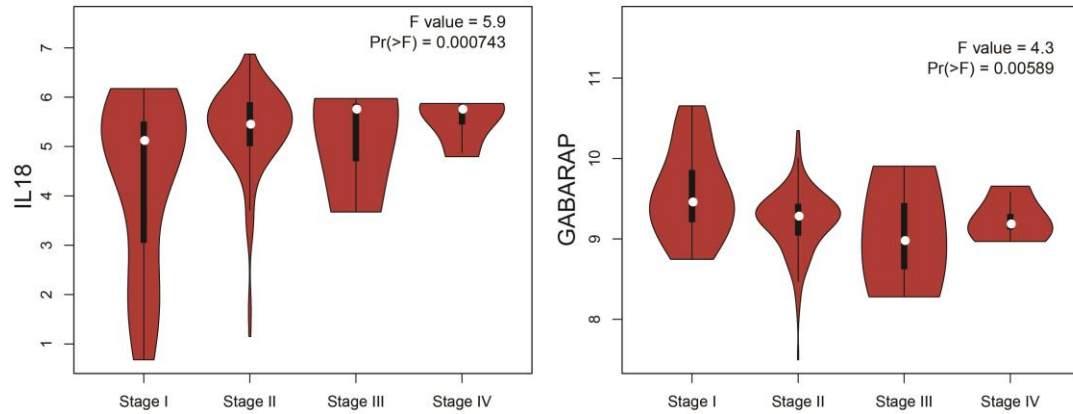

Supplementary Figure1: IL18 and GABARAP expressed distinctly in different pathological stages.

### Supplementary Figure2

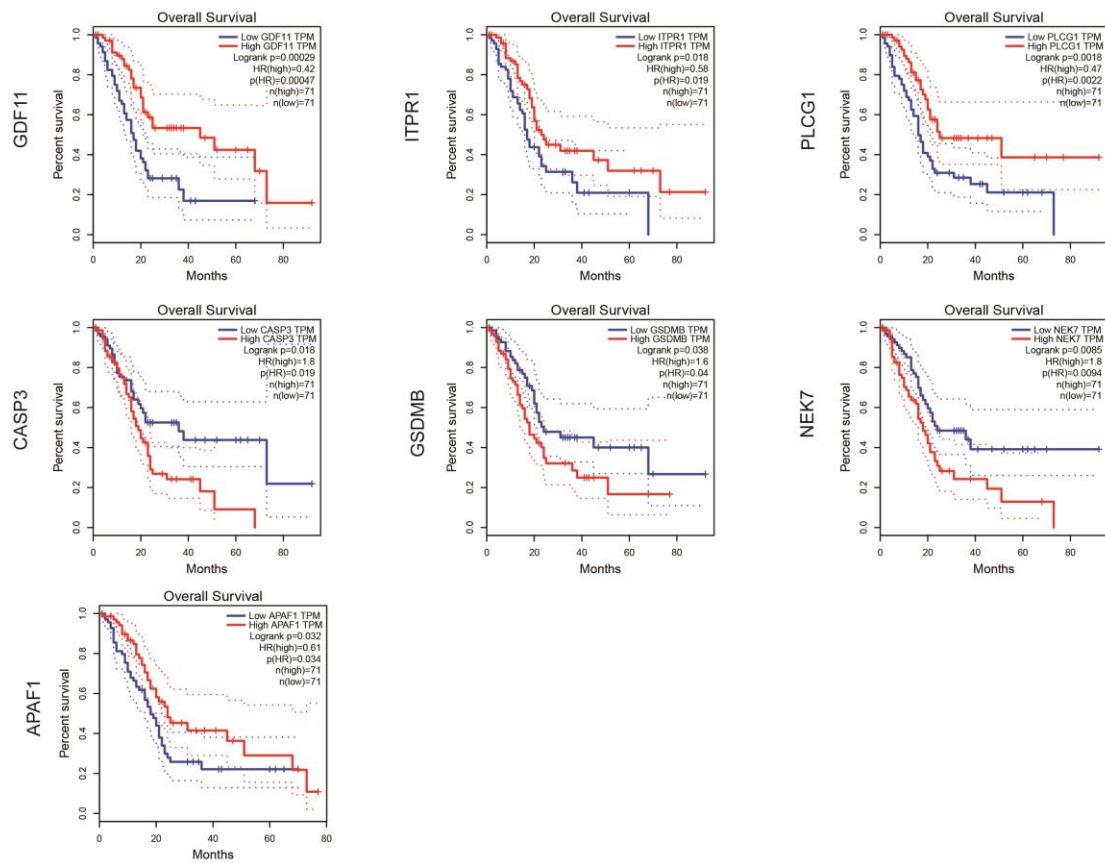

Supplementary Figure2: The pyroptosis related DEGs which are only related with OS .

### Supplementary Figure3

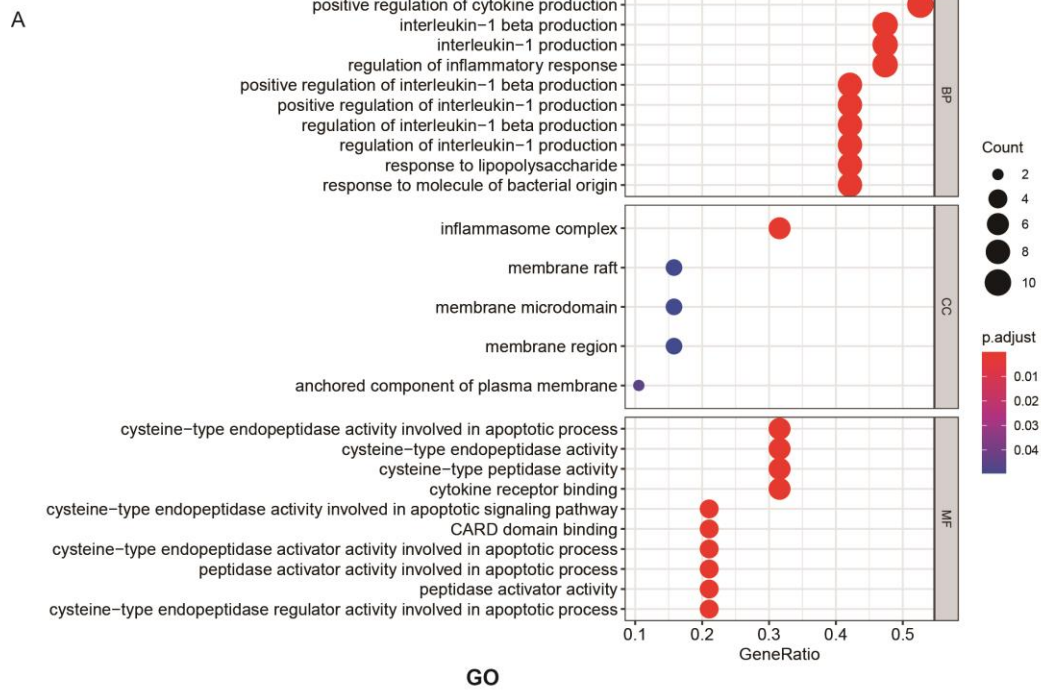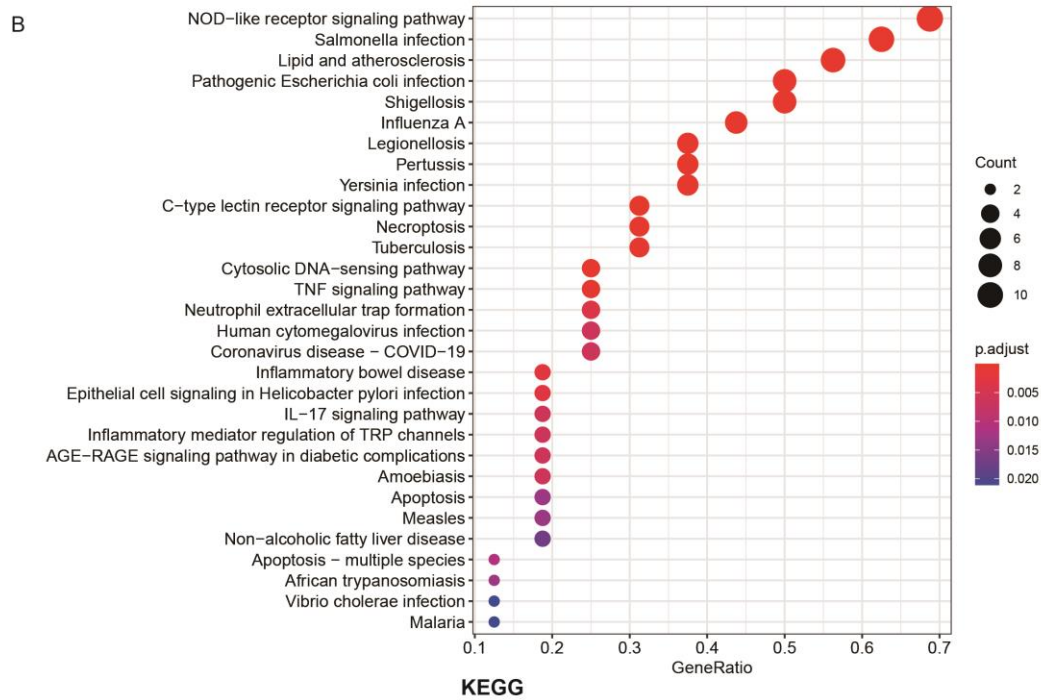

Supplementary Figure3:Go and KEGG of the prognostic pyroptosis related DEGs.

Supplementary Figure4

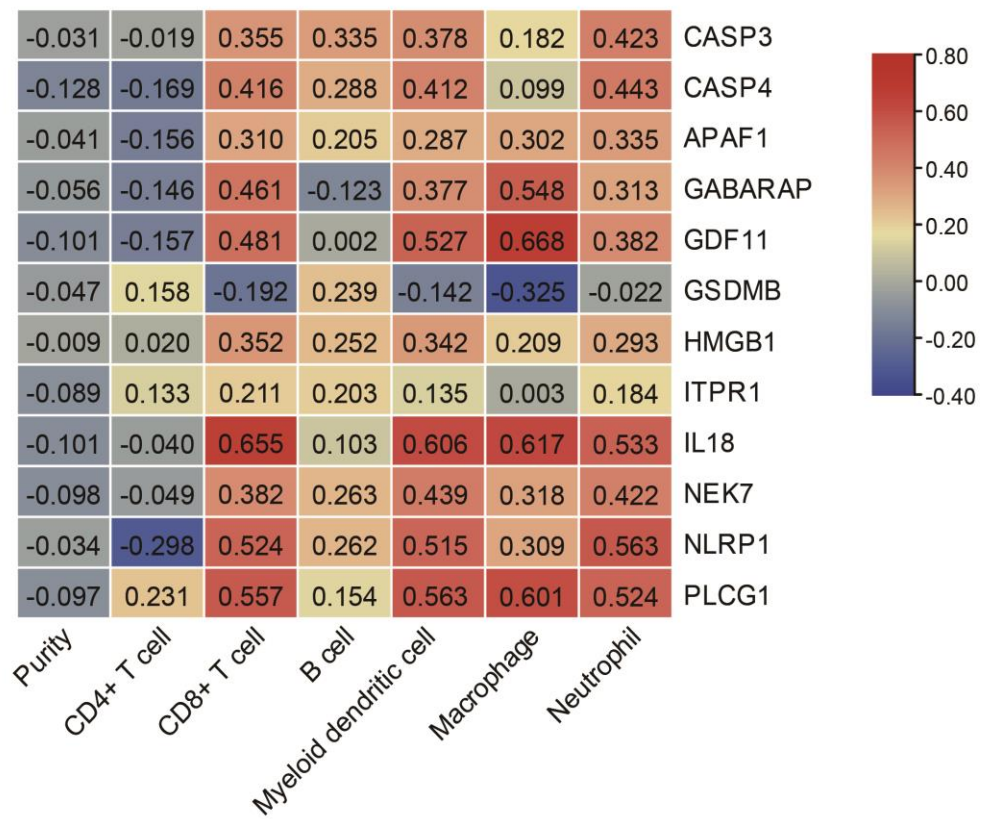

Supplementary Figure4: The summary of correlations between pyroptosis related DEGs and immune cells infiltration.
